# Supplementary material for: Contrasted phylogeographic patterns on mitochondrial DNA of shallow and deep brittle stars across the Atlantic-Mediterranean area
Source: PubMed Central journal article supplement (PMC5009426; doi:10.1038/srep32425), 2016-09-02
Supplement: srep32425-s1.pdf [file srep32425-s1.pdf]

- 1 **Contrasted phylogeographic patterns on mitochondrial DNA of shallow and deep**
- 2 **brittle stars across the Atlantic-Mediterranean area**
- 3
- 4 Sergi Taboada, Rocío Pérez-Portela

5 **Supplementary material**

6 **Figure S1.** Pictures of three specimens of the three *Ophiothrix* spp. investigated in this  
7 study. **A.1** *Ophiothrix fragilis* (specimen from Roscoff, Atlantic Ocean). **B.1** *Ophiothrix*  
8 sp. II (specimen from Alcudia, Mediterranean Sea). **C.1** *Ophiothrix* sp. III (specimen  
9 from Demersales-91, Cantabrian Sea). **A.2**, **B.2** and **C.2** detail of the disc in *Ophiothrix*  
10 *fragilis*, *Ophiothrix* sp. II, and *Ophiothrix* sp. III, respectively.

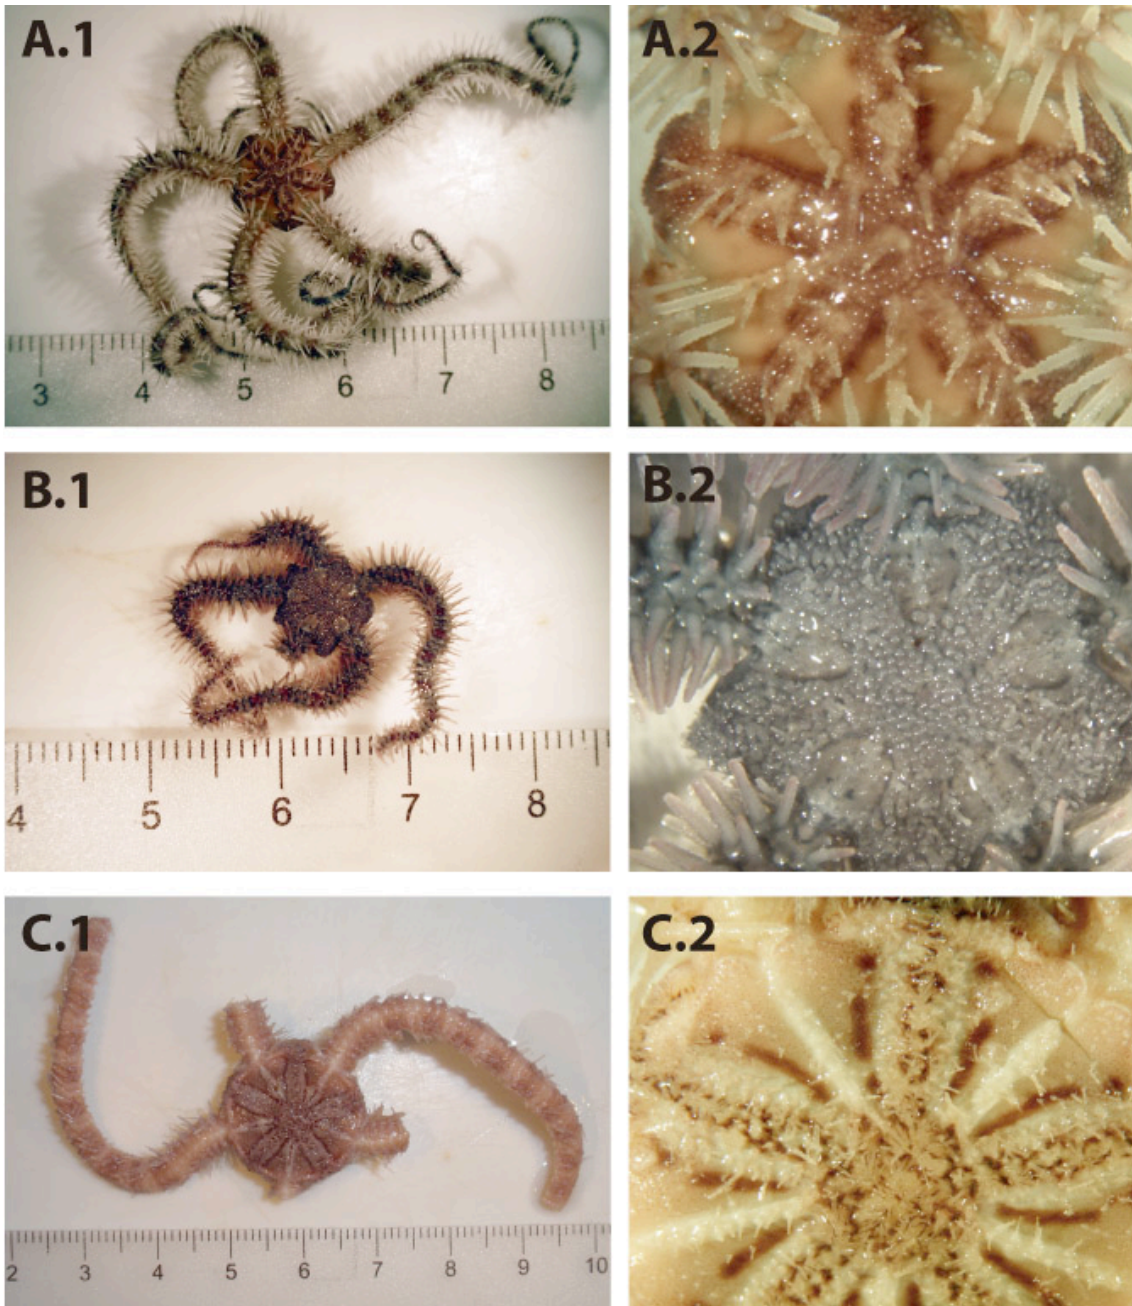

11

12 **Figure S2.** Maximum Likelihood phylogenetic tree of the genus *Ophiothrix*, including  
 13 *Ophiothrix fragilis*, *Ophiothrix* sp. II, and *Ophiothrix* sp. III, based on *16S* sequences.  
 14 Only bootstrap support values >30 are indicated in the main nodes. Sequences obtained  
 15 from Genbank are presented with Accession numbers.

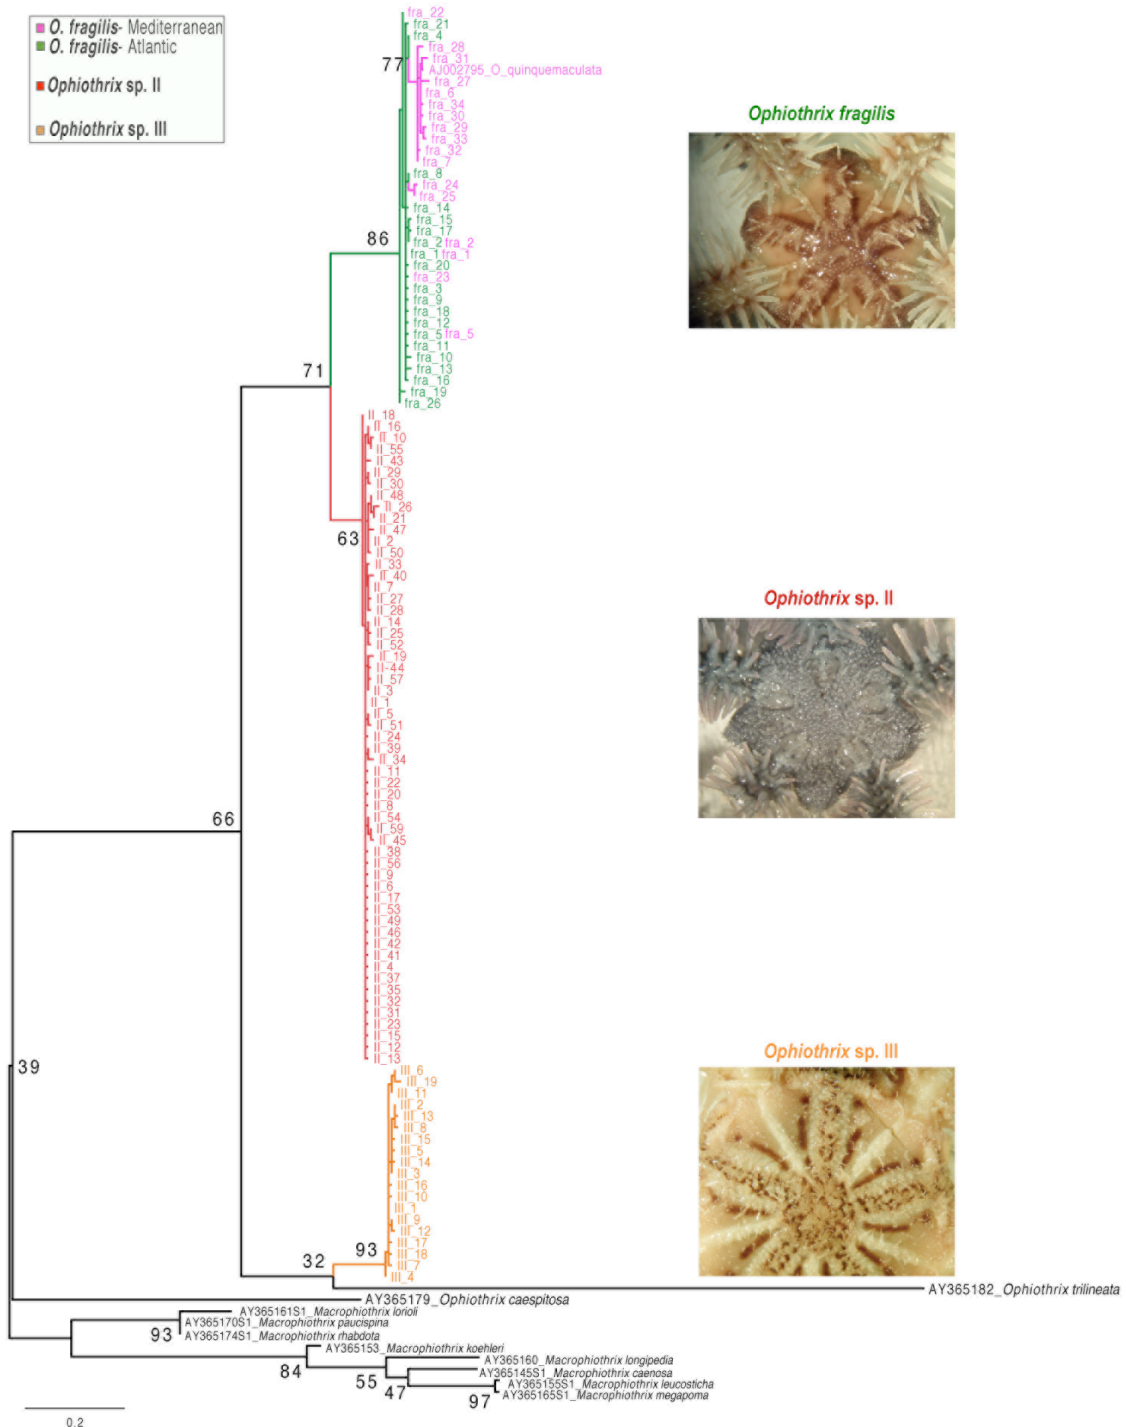

16

17

**Figure S3.** Maximum Likelihood phylogenetic tree of the genus *Ophiothrix*, including *Ophiothrix fragilis*, *Ophiothrix* sp. II, and *Ophiothrix* sp. III, based on *COI* sequences. Only bootstrap support values >30 are indicated in the main nodes. Sequences obtained from Genbank are presented with Accession numbers.\* Representative sequences of *O. fragilis* obtained from Muths *et al.* (2009).

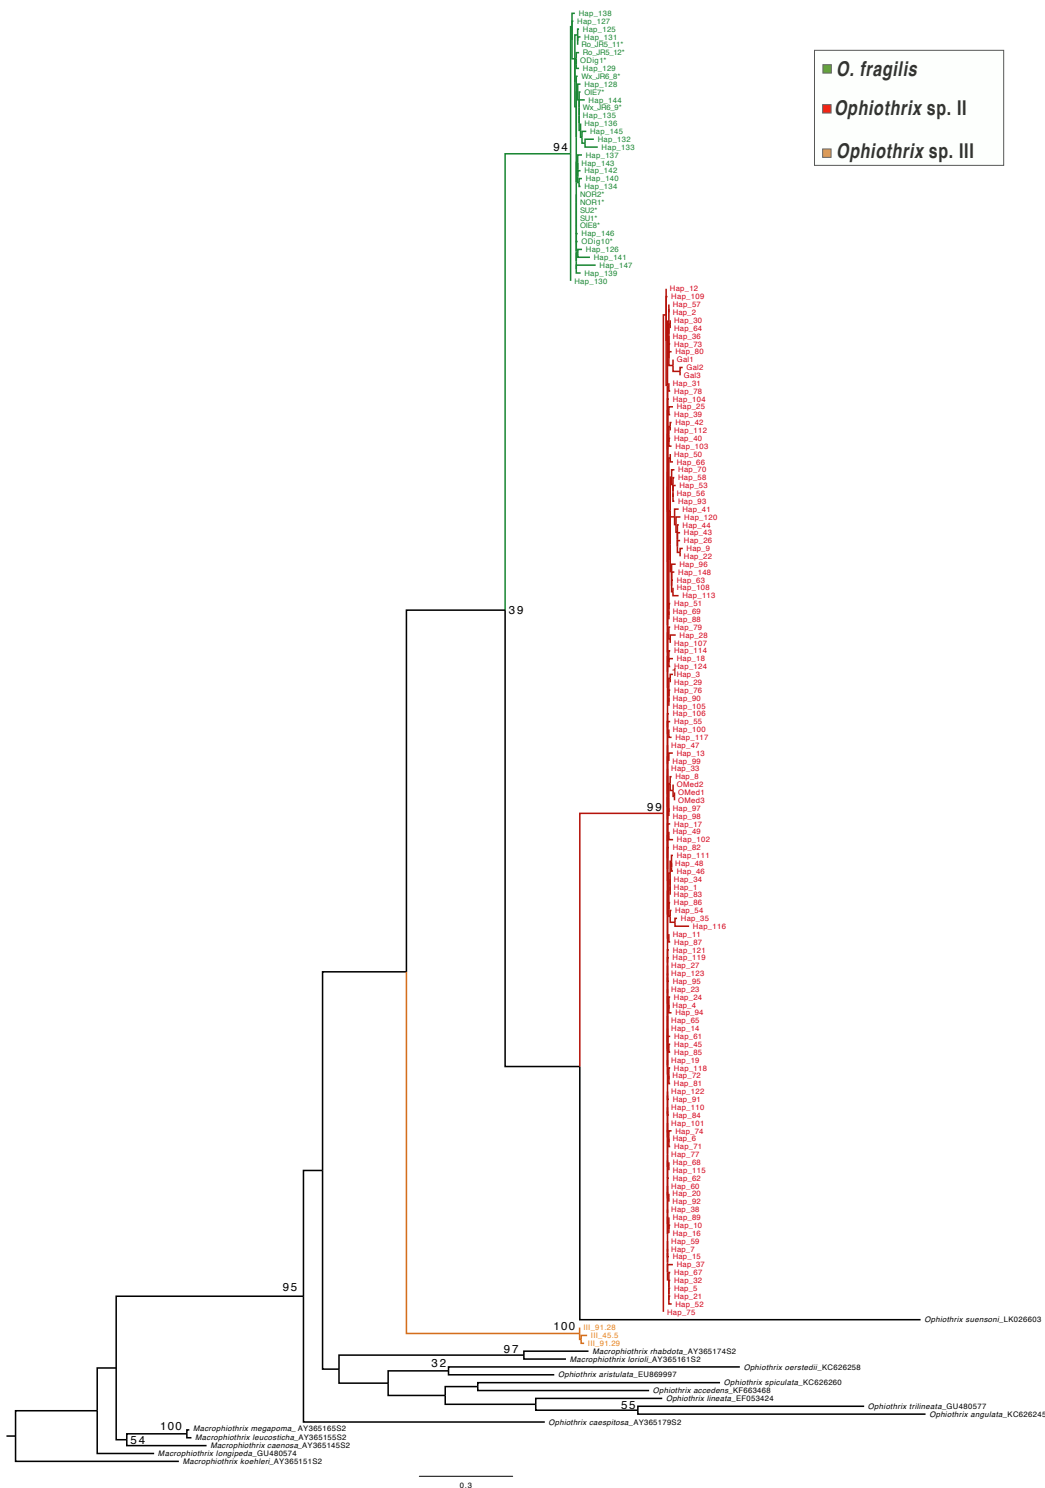



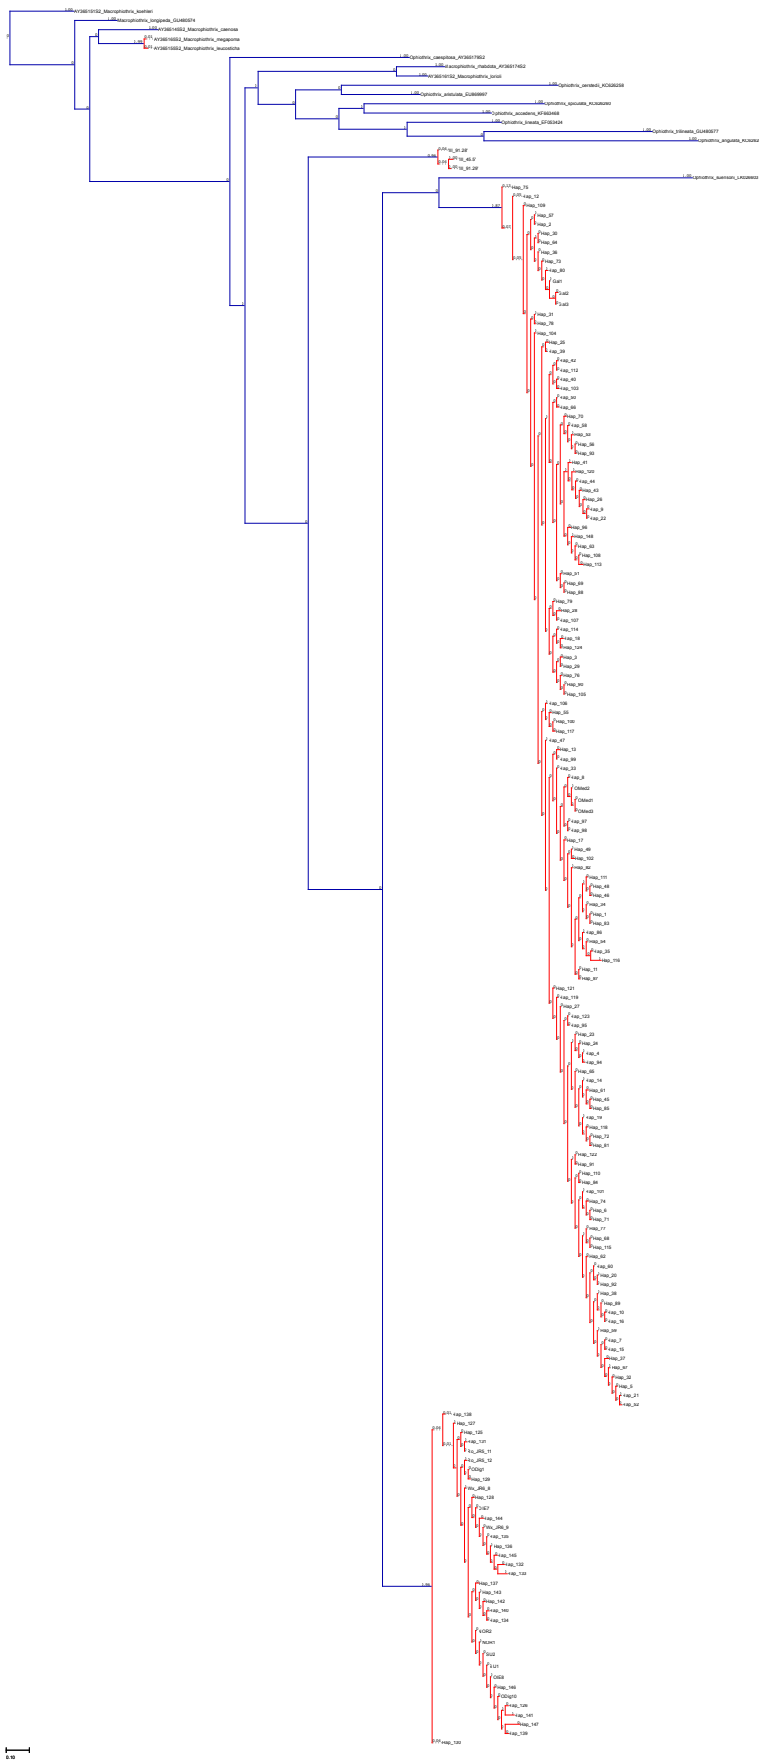

**Figure S5.** Results of the PTP analyses based on the ML topology for the *COI*. Putative species clusters are indicated using transitions between black-coloured to red-coloured branches.

**Figure S6.** Pairwise mismatch distributions for *Ophiothrix fragilis*, *Ophiothrix* sp. II, and *Ophiothrix* sp. III based on *16S* sequences. Observed data and theoretical expected distributions are represented by discontinuous and solid lines, respectively. For *Ophiothrix fragilis*, mismatch distributions for the Atlantic and Mediterranean basins are also represented separately.

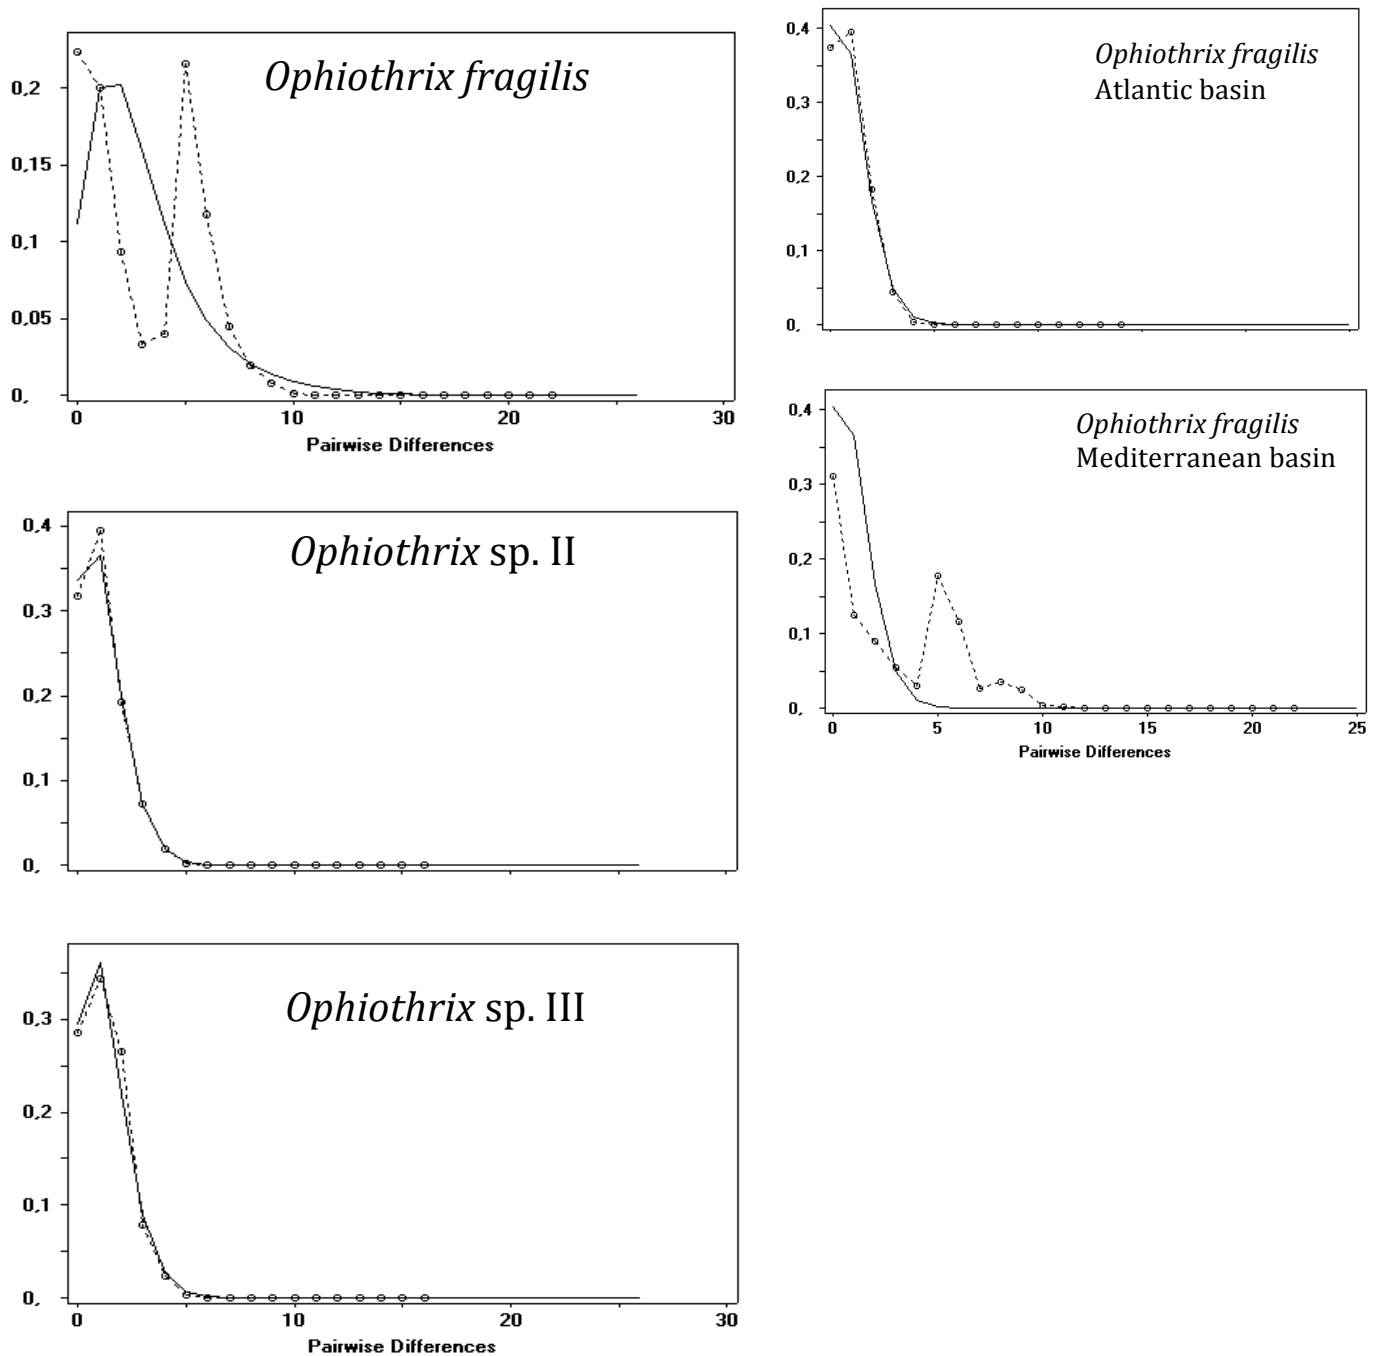

**Figure S7.** Demographic analyses of *Ophiothrix* sp. II based on Bayesian Skyline plot of the *COI* marker. Time is measured in million years. Black line illustrates mean size estimations, and blue lines show 95 % confidence interval.

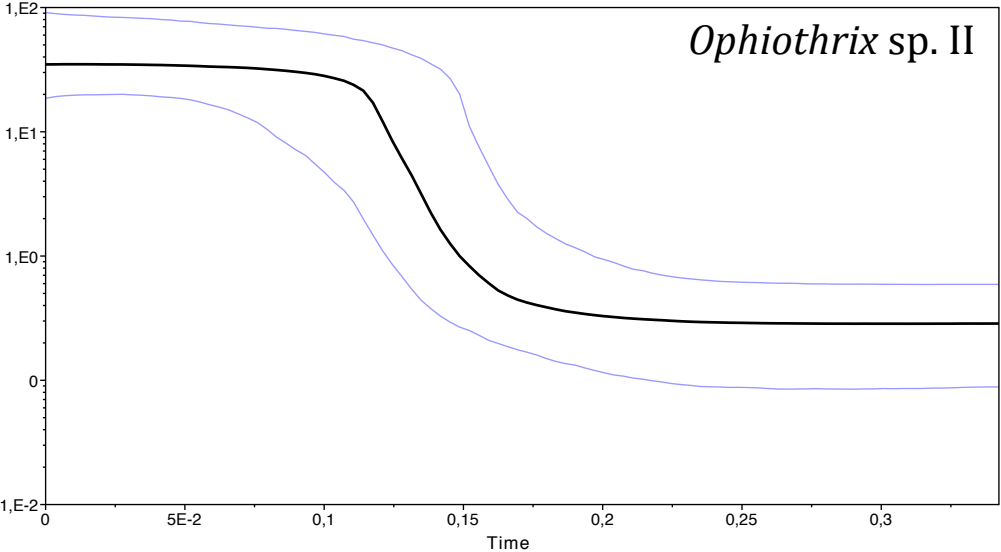



**Table S1.** Morphological and distribution differences among *Ophiothrix* species find in this study.

| Lineage                   | Colour                                                                                                                                                                                                                    | Disc shape        | Radial shields                                               | Disc diameter                                          | Disc spines                                                            | Known distribution                                                                                                                                                                                                       |
|---------------------------|---------------------------------------------------------------------------------------------------------------------------------------------------------------------------------------------------------------------------|-------------------|--------------------------------------------------------------|--------------------------------------------------------|------------------------------------------------------------------------|--------------------------------------------------------------------------------------------------------------------------------------------------------------------------------------------------------------------------|
| <i>O. fragilis</i>        | Pink, pale pink, purple, beige, white and/ or whitish                                                                                                                                                                     | Mostly rounded    | Wide and naked                                               | 7.1 mm -10.6 mm                                        | Large and elongated                                                    | Intertidal and shallow subtidal of North East Atlantic and North Sea, English Channel, and coast of Galicia (Atlantic coast of the Iberian Peninsula). Deep subtidal in the North Western Mediterranean (80-140m depth). |
| <i>Ophiothrix</i> sp. II  | Large variation in colours and patterns: grey, dark brown, bright brown, blue, dark blue, bright green, dark yellow, bright yellow, white, bright red and reddish. Some individuals with yellow/ bright green lined arms. | Mostly pentagonal | Small, partially covered by tubercles                        | 6.5 mm - 10.6 mm                                       | Short spinelets, three-four pointed homogenously distributed           | Intertidal and shallow subtidal of Atlantic coast of South Europe (Galician coast, Portugal, and the whole shallow subtidal of the Mediterranean Sea                                                                     |
| <i>Ophiothrix</i> sp. III | Pink, pale pink, purple, beige, white and/ or whitish                                                                                                                                                                     | Mostly rounded    | Wide, partially covered by tubercles and/ or small spinelets | Very variable among localities:<br>From 7.1mm to 18 mm | Spinelets, homogenously distributed but larger than in <i>O. sp</i> II | Deep subtidal (131-310 m depth) of the Cantabrian Sea, coast of Portugal and Alboran Sea                                                                                                                                 |

**Table S2.** Tables of putative *Ophiothrix* species based on the PTP method. **A** Analysis based on *16S* sequences. **B** Analysis based on *COI* sequences. See supplementary Figs S4 and S5.

**A**

| Maximum likelihood partition of PTP – <i>16S</i> fragment                                                                                                                                                                                                                                                                                                                                                                      |
|--------------------------------------------------------------------------------------------------------------------------------------------------------------------------------------------------------------------------------------------------------------------------------------------------------------------------------------------------------------------------------------------------------------------------------|
| Species 1 (support = 1.000)<br>AY365165S1_Macrophiothrix                                                                                                                                                                                                                                                                                                                                                                       |
| Species 2 (support = 1.000)<br>AY365153_Macrophiothrix                                                                                                                                                                                                                                                                                                                                                                         |
| Species 3 (support = 1.000)<br>AY365160_Macrophiothrix                                                                                                                                                                                                                                                                                                                                                                         |
| Species 4 (support = 1.000)<br>AY365145S1_Macrophiothrix                                                                                                                                                                                                                                                                                                                                                                       |
| Species 5 (support = 1.000)<br>AY365155S1_Macrophiothrix                                                                                                                                                                                                                                                                                                                                                                       |
| Species 6 (support = 1.000)<br>AY365161S1_Macrophiothrix                                                                                                                                                                                                                                                                                                                                                                       |
| Species 7 (support = 0.485)<br>AY365170S1_Macrophiothrix, AY365174S1_Macrophiothrix                                                                                                                                                                                                                                                                                                                                            |
| Species 8 (support = 1.000)<br>AY365179_ <i>O. caespitosa</i>                                                                                                                                                                                                                                                                                                                                                                  |
| <b>Species 9 (support = 1.000)</b><br><b>AY365182_<i>O. trilineata</i></b>                                                                                                                                                                                                                                                                                                                                                     |
| <b>Species 10 (support = 0.913)</b><br><b>(<i>Ophiothrix</i> sp. III)</b><br>III_4,III_7,III_18,III_17,III_12,III_9,III_1,III_10,III_16,III_3,III_14,III_5,III_15,III_8,III_13,III_2,III_11,III_19,III_6                                                                                                                                                                                                                       |
| <b>Species 11 (support = 0.740)</b><br><b>(<i>Ophiothrix</i> sp. II)</b><br>II_18,II_16,II_10,II_55,II_43,II_29,II_30,II_48,II_26,II_21,II_47,II_2,II_50,II_33,II_40,II_7,II_27,II_28,II_14,II_25,II_52,II_19,II_44,II_57,II_3,II_1,II_5,II_51,II_24,II_39,II_34,II_11,II_30_b,II_20,II_8,II_54,II_59,II_45,II_38,II_56,II_9,II_6,II_57_b,II_53,II_49,II_46,II_42,II_41,II_4,II_36_b,II_35,II_32,II_31,II_23,II_15,II_12,II_13 |
| <b>Species 12 (support = 0.892)</b><br><b>(<i>Ophiothrix fragilis</i>)</b><br>fra_19,fra_26,fra_22,fra_8,fra_24,fra_25,fra_21,fra_4,fra_28,fra_31,AJ002795_ <i>O. quinquemaculata</i> ,fra_27,fra_6,fra_34,fra_30,fra_29,fra_33,fra_32,fra_7,fra_16,fra_14,fra_15,fra_17,fra_2,fra_1,fra_20,fra_23,fra_3,fra_9,fra_18,fra_12,fra_5,fra_11,fra_10,fra_13                                                                        |

**B****Maximum likelihood partition of PTP – COI fragment**

---

Species 1 (support = 1.000)

AY365151S2\_Macrothrix\_koehlerii

---

Species 2 (support = 1.000)

Ophiothrix\_suensoni\_LK026603

---

**Species 3 (support = 0.873)**

**(*Ophiothrix* sp. II)**

Hap\_75,Hap\_12,Hap\_109,Hap\_57,Hap\_2,Hap\_30,Hap\_64,Hap\_36,Hap\_73,Hap\_80,Gal1,Gal2,Gal3,Hap\_31,Hap\_78,Hap\_104,Hap\_25,Hap\_39,Hap\_42,Hap\_112,Hap\_40,Hap\_103,Hap\_50,Hap\_66,Hap\_70,Hap\_58,Hap\_53,Hap\_56,Hap\_93,Hap\_41,Hap\_120,Hap\_44,Hap\_43,Hap\_26,Hap\_9,Hap\_22,Hap\_96,Hap\_148,Hap\_63,Hap\_108,Hap\_113,Hap\_51,Hap\_69,Hap\_88,Hap\_79,Hap\_28,Hap\_107,Hap\_114,Hap\_18,Hap\_124,Hap\_3,Hap\_29,Hap\_76,Hap\_90,Hap\_105,Hap\_106,Hap\_55,Hap\_100,Hap\_117,Hap\_47,Hap\_13,Hap\_99,Hap\_33,Hap\_8,OMed2,OMed1,OMed3,Hap\_97,Hap\_98,Hap\_17,Hap\_49,Hap\_102,Hap\_82,Hap\_111,Hap\_48,Hap\_46,Hap\_34,Hap\_1,Hap\_83,Hap\_86,Hap\_54,Hap\_35,Hap\_116,Hap\_11,Hap\_87,Hap\_121,Hap\_119,Hap\_27,Hap\_123,Hap\_95,Hap\_23,Hap\_24,Hap\_4,Hap\_94,Hap\_65,Hap\_14,Hap\_61,Hap\_45,Hap\_85,Hap\_19,Hap\_118,Hap\_72,Hap\_81,Hap\_122,Hap\_91,Hap\_110,Hap\_84,Hap\_101,Hap\_74,Hap\_6,Hap\_71,Hap\_77,Hap\_68,Hap\_115,Hap\_62,Hap\_60,Hap\_20,Hap\_92,Hap\_38,Hap\_89,Hap\_10,Hap\_16,Hap\_59,Hap\_7,Hap\_15,Hap\_37,Hap\_67,Hap\_32,Hap\_5,Hap\_21,Hap\_52

---

**Species 4 (support = 0.957)**

**(*Ophiothrix fragilis*)**

Hap\_138,Hap\_127,Hap\_125,Hap\_131,Ro\_JR5\_11,Ro\_JR5\_12,ODig1,Hap\_129,Wx\_JR6\_8,Hap\_128,OIE7,Hap\_144,Wx\_JR6\_9,Hap\_135,Hap\_136,Hap\_145,Hap\_132,Hap\_133,Hap\_137,Hap\_143,Hap\_142,Hap\_140,Hap\_134,NOR2,NOR1,SU2,SU1,OIE8,Hap\_146,ODig10,Hap\_126,Hap\_141,Hap\_147,Hap\_139,Hap\_130

---

**Species 5 (support = 0.959)**

**(*Ophiothrix* sp. III)**

**III\_91.28,III\_45.5,III\_91.29**

---

Species 6 (support = 1.000)

Ophiothrix\_caespitosa\_AY365179S2

---

Species 7 (support = 1.000)

Macrothrix\_longipeda\_GU480574

---

Species 8 (support = 1.000)

Ophiothrix\_oerstedii\_KC626258

---

Species 9 (support = 1.000)

Ophiothrix\_aristulata\_EU869997

---

Species 10 (support = 1.000)

Ophiothrix\_trilineata\_GU480577

---

Species 11 (support = 1.000)

Ophiothrix\_angulata\_KC626245

---

Species 12 (support = 1.000)

Ophiothrix\_lineata\_EF053424

---

Species 13 (support = 1.000)

Ophiothrix\_spiculata\_KC626260

---

Species 14 (support = 1.000)

Ophiothrix\_accedens\_KF663468

---

Species 15 (support = 1.000)

AY365145S2\_Macrothrix\_caenosa

---

Species 16 (support = 0.994)

AY365165S2\_Macrothrix\_megapoma,AY365155S2\_Macrothrix\_leucosticha

---

Species 17 (support = 1.000)

Macrothrix\_rhabdota\_AY365174S2

---

Species 18 (support = 1.000)

AY365161S2\_Macrothrix\_lorioli

---

**Table S3.** Pairwise *COI* genetic distances based on a Kimura 2-parameter model (K2p) between *Ophiothrix* species available from Genbank (171 sequences), and sequences obtained in this study. SE, standard error.

| Species 1                 | Species 2                 | Kp2    | SE      |
|---------------------------|---------------------------|--------|---------|
| <i>Ophiothrix</i> sp. II  | <i>O. fragilis</i>        | 0.1895 | 0.02233 |
| <i>Ophiothrix</i> sp. II  | <i>Ophiothrix</i> sp. III | 0.2200 | 0.02438 |
| <i>O. fragilis</i>        | <i>Ophiothrix</i> sp. III | 0.2021 | 0.02307 |
| <i>Ophiothrix</i> sp. II  | <i>O. trilineata</i>      | 0.2798 | 0.02994 |
| <i>O. fragilis</i>        | <i>O. trilineata</i>      | 0.2367 | 0.02640 |
| <i>Ophiothrix</i> sp. III | <i>O. trilineata</i>      | 0.2642 | 0.02791 |
| <i>Ophiothrix</i> sp. II  | <i>O. caespitosa</i>      | 0.2696 | 0.02970 |
| <i>O. fragilis</i>        | <i>O. caespitosa</i>      | 0.2675 | 0.02996 |
| <i>Ophiothrix</i> sp. III | <i>O. caespitosa</i>      | 0.2540 | 0.02675 |
| <i>O. trilineata</i>      | <i>O. caespitosa</i>      | 0.2932 | 0.03222 |
| <i>Ophiothrix</i> sp. II  | <i>O. accedens</i>        | 0.2652 | 0.02784 |
| <i>O. fragilis</i>        | <i>O. accedens</i>        | 0.2480 | 0.02626 |
| <i>Ophiothrix</i> sp. III | <i>O. accedens</i>        | 0.2419 | 0.02665 |
| <i>O. trilineata</i>      | <i>O. accedens</i>        | 0.2612 | 0.02848 |
| <i>O. caespitosa</i>      | <i>O. accedens</i>        | 0.2602 | 0.02920 |
| <i>Ophiothrix</i> sp. II  | <i>O. aristulata</i>      | 0.2453 | 0.02719 |
| <i>O. fragilis</i>        | <i>O. aristulata</i>      | 0.2145 | 0.02482 |
| <i>Ophiothrix</i> sp. III | <i>O. aristulata</i>      | 0.2000 | 0.02427 |
| <i>O. trilineata</i>      | <i>O. aristulata</i>      | 0.2543 | 0.02818 |
| <i>O. caespitosa</i>      | <i>O. aristulata</i>      | 0.2392 | 0.02757 |
| <i>O. accedens</i>        | <i>O. aristulata</i>      | 0.1966 | 0.02393 |
| <i>Ophiothrix</i> sp. II  | <i>O. angulata</i>        | 0.2655 | 0.02900 |
| <i>O. fragilis</i>        | <i>O. angulata</i>        | 0.2495 | 0.02570 |
| <i>Ophiothrix</i> sp. III | <i>O. angulata</i>        | 0.2698 | 0.02861 |
| <i>O. trilineata</i>      | <i>O. angulata</i>        | 0.2278 | 0.02480 |
| <i>O. caespitosa</i>      | <i>O. angulata</i>        | 0.2543 | 0.02815 |
| <i>O. accedens</i>        | <i>O. angulata</i>        | 0.2376 | 0.02607 |
| <i>O. aristulata</i>      | <i>O. angulata</i>        | 0.2541 | 0.02825 |
| <i>Ophiothrix</i> sp. II  | <i>O. lineata</i>         | 0.2493 | 0.02711 |
| <i>O. fragilis</i>        | <i>O. lineata</i>         | 0.2324 | 0.02588 |
| <i>Ophiothrix</i> sp. III | <i>O. lineata</i>         | 0.2291 | 0.02526 |
| <i>O. trilineata</i>      | <i>O. lineata</i>         | 0.2170 | 0.02601 |
| <i>O. caespitosa</i>      | <i>O. lineata</i>         | 0.2496 | 0.02898 |
| <i>O. accedens</i>        | <i>O. lineata</i>         | 0.2027 | 0.02434 |
| <i>O. aristulata</i>      | <i>O. lineata</i>         | 0.2024 | 0.02481 |
| <i>O. angulata</i>        | <i>O. lineata</i>         | 0.2054 | 0.02452 |
| <i>Ophiothrix</i> sp. II  | <i>O. spiculata</i>       | 0.2621 | 0.02797 |
| <i>O. fragilis</i>        | <i>O. spiculata</i>       | 0.2528 | 0.02755 |
| <i>Ophiothrix</i> sp. III | <i>O. spiculata</i>       | 0.2307 | 0.02628 |
| <i>O. trilineata</i>      | <i>O. spiculata</i>       | 0.2610 | 0.02869 |
| <i>O. caespitosa</i>      | <i>O. spiculata</i>       | 0.2730 | 0.03011 |
| <i>O. accedens</i>        | <i>O. spiculata</i>       | 0.2158 | 0.02556 |
| <i>O. aristulata</i>      | <i>O. spiculata</i>       | 0.2380 | 0.02693 |
| <i>O. angulata</i>        | <i>O. spiculata</i>       | 0.2888 | 0.03110 |
| <i>O. lineata</i>         | <i>O. spiculata</i>       | 0.1907 | 0.02349 |
| <i>Ophiothrix</i> sp. II  | <i>O. oerstedii</i>       | 0.3017 | 0.03060 |
| <i>O. fragilis</i>        | <i>O. oerstedii</i>       | 0.2928 | 0.03039 |
| <i>Ophiothrix</i> sp. III | <i>O. oerstedii</i>       | 0.2620 | 0.02760 |
| <i>O. trilineata</i>      | <i>O. oerstedii</i>       | 0.2574 | 0.02765 |
| <i>O. caespitosa</i>      | <i>O. oerstedii</i>       | 0.2481 | 0.02805 |
| <i>O. accedens</i>        | <i>O. oerstedii</i>       | 0.2307 | 0.02637 |
| <i>O. aristulata</i>      | <i>O. oerstedii</i>       | 0.2091 | 0.02462 |
| <i>O. angulata</i>        | <i>O. oerstedii</i>       | 0.2571 | 0.02773 |

|                           |                     |        |         |
|---------------------------|---------------------|--------|---------|
| <i>O. lineata</i>         | <i>O. oerstedii</i> | 0.2055 | 0.02413 |
| <i>O. spiculata</i>       | <i>O. oerstedii</i> | 0.2543 | 0.02758 |
| <i>Ophiothrix</i> sp. II  | <i>O. suenisoni</i> | 0.2211 | 0.02482 |
| <i>O. fragilis</i>        | <i>O. suenisoni</i> | 0.2455 | 0.02734 |
| <i>Ophiothrix</i> sp. III | <i>O. suenisoni</i> | 0.2780 | 0.03053 |
| <i>O. trilineata</i>      | <i>O. suenisoni</i> | 0.2852 | 0.03141 |
| <i>O. caespitosa</i>      | <i>O. suenisoni</i> | 0.2377 | 0.02698 |
| <i>O. accedens</i>        | <i>O. suenisoni</i> | 0.2610 | 0.02807 |
| <i>O. aristulata</i>      | <i>O. suenisoni</i> | 0.2442 | 0.02753 |
| <i>O. angulata</i>        | <i>O. suenisoni</i> | 0.2341 | 0.02605 |
| <i>O. lineata</i>         | <i>O. suenisoni</i> | 0.2244 | 0.02656 |
| <i>O. spiculata</i>       | <i>O. suenisoni</i> | 0.2447 | 0.02740 |
| <i>O. oerstedii</i>       | <i>O. suenisoni</i> | 0.2811 | 0.02914 |

---

**Table S4.**  $\Phi_{ST}$  values between pairs of populations for *Ophiothrix* sp. II.

| <i>Ophiothrix</i> sp. II |            |            |            |            |           |            |           |            |           |           |
|--------------------------|------------|------------|------------|------------|-----------|------------|-----------|------------|-----------|-----------|
|                          | <b>FER</b> | <b>CAS</b> | <b>APA</b> | <b>CEB</b> | <b>LH</b> | <b>XAB</b> | <b>RS</b> | <b>CAD</b> | <b>AL</b> | <b>LK</b> |
| <b>CAS</b>               | 0.00733    | –          |            |            |           |            |           |            |           |           |
| <b>APA</b>               | -0.01032   | -0.01243   | –          |            |           |            |           |            |           |           |
| <b>CEB</b>               | 0.02940    | -0.01116   | -0.00130   | –          |           |            |           |            |           |           |
| <b>LH</b>                | -0.01475   | -0.01392   | -0.02339   | 0.00786    | –         |            |           |            |           |           |
| <b>XAB</b>               | 0.02698    | -0.00757   | 0.00107    | -0.00394   | 0.00782   | –          |           |            |           |           |
| <b>RS</b>                | -0.03315   | 0.00201    | -0.01959   | 0.02485    | -0.02799  | 0.01439    | –         |            |           |           |
| <b>CAD</b>               | -0.01551   | 0.01867    | -0.00966   | 0.03665    | -0.01140  | 0.03495    | -0.03020  | –          |           |           |
| <b>AL</b>                | 0.01792    | -0.00316   | 0.00462    | -0.01065   | 0.00515   | -0.02009   | 0.00417   | 0.02509    | –         |           |
| <b>LK</b>                | 0.00655    | 0.00681    | -0.00348   | -0.00487   | 0.00527   | 0.00869    | -0.01196  | 0.00947    | 0.00029   | –         |
| <b>KB</b>                | -0.03132   | -0.02778   | -0.03494   | -0.01534   | -0.02392  | -0.00243   | -0.00529  | -0.00819   | -0.00596  | -0.01196  |

**Table S5.**  $\Phi_{ST}$  values between pairs of populations for *Ophiothrix* sp. III.

| <i>Ophiothrix</i> sp. III |               |            |              |               |
|---------------------------|---------------|------------|--------------|---------------|
|                           | <b>PINDAL</b> | <b>POR</b> | <b>DEM45</b> | <b>DEM131</b> |
| <b>POR</b>                | -0.07290      | –          |              |               |
| <b>DEM45</b>              | -0.04366      | -0.06191   | –            |               |
| <b>DEM131</b>             | -0.04891      | -0.04571   | -0.0360      | –             |
| <b>DEM91</b>              | -0.03199      | -0.01309   | -0.01847     | -0.02689      |
